# Supplementary material for: Epidemiology and Management of ST‐Segment–Elevation Myocardial Infarction in Patients With COVID‐19: A Report From the American Heart Association COVID‐19 Cardiovascular Disease Registry
Source: PubMed Central journal article supplement — J Am Heart Assoc. 2022 Apr 26;11(9):e024451. doi: 10.1161/JAHA.121.024451 (PMC9238583; doi:10.1161/jaha.121.024451), 2022-04-26
Supplement: JAH3-11-e024451-s001.pdf [file JAH3-11-e024451-s001.pdf]

# **Supplemental Material**

**Table S1. Diagnostic and Therapeutic Evaluations Among Patients with STEMI by Time Period.**

|                                                            | <b>Admission Prior to<br/>June 1, 2020</b> | <b>Admission June 1, 2020, or<br/>later</b> |
|------------------------------------------------------------|--------------------------------------------|---------------------------------------------|
| <b><i>Diagnostic and Therapeutic Evaluations</i></b>       | <b>STEMI (N=37)</b>                        | <b>STEMI (N=17)</b>                         |
| <b><i>Diagnostic Evaluations</i></b>                       |                                            |                                             |
| <b>Transthoracic Echocardiography</b>                      | 23 (62.2)                                  | 17 (100.0)                                  |
| <b>LVEF (%), median, (25<sup>th</sup>-75<sup>th</sup>)</b> | 42.5 (35.0-57.0)                           | 47.0 (40.0-55.0)                            |
| <b>Coronary Angiography</b>                                | 15 (40.5)                                  | 12 (70.6)                                   |
| <b>CCTA</b>                                                | 0 (0.0)                                    | 0 (0.0)                                     |
| <b>Invasive</b>                                            | 15 (100.0)                                 | 12 (100.0)                                  |
|                                                            |                                            |                                             |
| <b><i>Angiographic Findings (n=27)</i></b>                 |                                            |                                             |
| <b># Vessels with &gt;50% stenosis</b>                     |                                            |                                             |
| <b>0</b>                                                   | 3 (20.0)                                   | 0 (0.0)                                     |
| <b>1</b>                                                   | 2 (13.3)                                   | 6 (50.0)                                    |
| <b>2</b>                                                   | 4 (26.7)                                   | 3 (25.0)                                    |
| <b>&gt;=3</b>                                              | 5 (33.3)                                   | 3 (25.0)                                    |
| <b>Left Main Coronary Disease</b>                          | 1 (6.7)                                    | 0 (0.0)                                     |
|                                                            |                                            |                                             |
| <b><i>STEMI Reperfusion</i></b>                            |                                            |                                             |
| <b>Primary PCI</b>                                         | 9 (24.3)                                   | 12 (70.6)                                   |
| <b>Fibrinolytic Therapy</b>                                | 3 (8.1)                                    | 3 (17.7)                                    |
| <b>No Reperfusion</b>                                      | 25 (67.6)                                  | 2 (11.7)                                    |

25<sup>th</sup>, 75<sup>th</sup> = 25<sup>th</sup> and 75<sup>th</sup> quartiles; LVEF = left ventricular ejection fraction; CCTA = Coronary Computed Tomography Angiography; PCI = Percutaneous Coronary Intervention

**Table S2. Multivariate Associations of STEMI Status and In-Hospital Mortality Among Patients Hospitalized with COVID-19.**

|          | Adjusted OR (95% CI) | P-Value |
|----------|----------------------|---------|
| Model 1* | 3.14 (1.80-5.63)     | <0.001  |
| Model 2^ | 2.95 (1.59-5.49)     | <0.001  |

\* Adjusted for age and sex

^ Adjusted for age, sex, history of coronary artery disease, heart failure, chronic kidney disease, diabetes, pulmonary disease, immune disorder, pulmonary embolism/deep venous thrombosis, and obesity
